# Supplementary material for: Satisfaction, Usability, and Compliance With the Use of Smartwatches for Ecological Momentary Assessment of Knee Osteoarthritis Symptoms in Older Adults: Usability Study
Source: PubMed Central journal article supplement (PMC8319786; doi:10.2196/24553), 2021-07-14
Supplement: aging_v4i3e24553_app1.pdf [file aging_v4i3e24553_app1.pdf]

# EXIT QUESTIONNAIRE

## ATTENTION!

Please complete this questionnaire before returning the study items, after wearing the smartwatch for two weeks, on the following date.

To Be Completed On:

--/--/----

**UF** Institute on Aging  
UNIVERSITY of FLORIDA

## **Your opinions about the Samsung smartwatch matter**

Please answer the following questions about wearing the Samsung smartwatch. Please answer honestly because your answers will help us plan for the future of wearable technology dedicated to the health of older adults.

### **1. Do you regularly wear a wristwatch?**

- Yes                       No

### **2. Would you wear the Samsung smartwatch as your personal watch without being asked to wear it as part of a research study?**

- Yes                       No

### **3. How comfortable was the Samsung smartwatch to wear on a daily basis?**

- Very comfortable                       Comfortable  
 Somewhat comfortable                       Not comfortable

### **4. What would you change to improve the comfort of wearing the Samsung smartwatch?**

- No changes needed  
 Reduce wristband size  
 Improve wristband clasp function  
 Reduce weight of the watch  
 Reduce display size  
 Change the material of the wristband (cloth, metal etc.)  
 Other \_\_\_\_\_

### **5. How likely are you to participate in a one-year research study asking you to wear the Samsung smartwatch daily?**

- Very likely                       Likely  
 Somewhat likely                       Not likely

**5a. If your answer was “somewhat likely” or “not likely”, what is the most amount of time you would agree to wear the Samsung smartwatch?**

- 1 month       3 months  
 6 months       9 months       None

**5b. If you answered “somewhat likely” or “not likely” to participate, what are some of the reasons for you answer (you can check more than one choice)?**

- Uncomfortable (e.g. too tight or too loose)  
 Not stylish  
 Too bulky  
 Too fragile  
 It gets in the way  
 The screen is hard to read  
 The screen was not responsive  
 Other (please write below any other reasons)
- 
- 

**6. For research purposes, would you occasionally wear the watch while sleeping? How likely would you be to participate in a study that asked you to occasionally wear the watch while sleeping?**

- Yes       No

**7a. Was the text large enough to read?**

- Yes       No

**8. Was it easy to enter the ratings using the smartwatch?**

Yes                       No

**8.a If 'No', can you provide more details?**

**9. Did you charge it every night?**

Yes                       No

**10. Did the watch ever run out of battery (i.e. battery died) while you were wearing it?**

Yes                       No

**10.a If 'Yes', how many times? \_\_\_\_\_ times**

**11. How satisfied were you with the function of the watch (i.e. you were able to tell date/time easily)?**

Very satisfied                       Satisfied

Somewhat satisfied                       Not satisfied

**12. How satisfied were you with charging the battery of the Samsung smartwatch?**

Very satisfied                       Satisfied

Somewhat satisfied                       Not satisfied

**13. Are there any other opinions about the Samsung smartwatch that you would like to share with us?**

---

---

---
